# Supplementary material
Source: PubMed Central journal article supplement (PMC8556414)
Supplement: NIHMS1739111-supplement-supplemental_material.pdf [file NIHMS1739111-supplement-supplemental_material.pdf]

## Supplementary information

### **Neuromodulatory effect of interleukin 1 $\beta$ in the dorsal raphe nucleus on individual differences in aggression**

Takahashi A, Aleyasin H, Stavarache MA, Li L, Cathomas F, Parise L, Lin H, Burnett C, Flanigan ME, Brancato A, Menard C, Pfau ML, Kana V, Wang J, Hodes GE, Sasaki T, Kaplitt MG, Ogawa S, McEwen BS, and Russo SJ.

Supplementary Table 1, 2, 3, 4, 5, 6

Supplemental Figure 1, 2, 3, 4, 5, 6, 7

Supplementary Table 1. IL1R1 shRNA sequences

|                 |                                                                              |
|-----------------|------------------------------------------------------------------------------|
| <b>IL1RI-1a</b> | gatcccc <u>gtgcctctgctgctgcctggacttctgtcatccagcgacagcagaggcactttttggaat</u>  |
| <b>IL1RI-1b</b> | ctagattccaaaaaag <u>tgctctgctgctgcctggatgacaggaagtccagcgacagcagaggcacggg</u> |
| <b>IL1RI-2a</b> | gatcccc <u>gtcttcaaggttgacatagtgcttctgtcacactatgtcaacctgaagactttttggaat</u>  |
| <b>IL1RI-2b</b> | ctagattccaaaaaag <u>tcttcaaggttgacatagtgacaggaagcactatgtcaacctgaagacggg</u>  |

**Supplementary Table 2. Statistics for supplementary figures.**

| <b>Supplementary Figure 1: Behavior characterization of AGGs, NONs, and variables (n=123)</b> |                         |                         |                           |
|-----------------------------------------------------------------------------------------------|-------------------------|-------------------------|---------------------------|
| Repeated 2-way ANOVA                                                                          |                         |                         |                           |
|                                                                                               | Main effect of Groups   | Main effect of Days     | Groups x Days Interaction |
| Attack bites (frequency)                                                                      | F(2,246)=62.58, p<.0001 | F(2,246)=18.97, p<.0001 | F(4,246)=3.985, p<.0001   |
| Sideways threats (duration)                                                                   | F(2,246)=68.15, p<.0001 | F(2,246)=17.54, p<.0001 | F(4,246)=34.932, p=.0008  |
| Tail rattles (duration)                                                                       | F(2,246)=40.73, p<.0001 | F(2,246)=12.13, p<.0001 | F(4,246)=7.026, p<.0001   |
| Pursuit (duration)                                                                            | F(2,246)=9.917, p=.0002 | F(2,246)=3.464, p=.0328 | -                         |
| Locomotion (duration)                                                                         | F(2,246)=6.752, p=.0017 | F(2,246)=7.933, p=.0005 | F(4,246)=2.216, p=.0678   |
| Rearing (duration)                                                                            | F(2,246)=3.292, p=.0405 | F(2,246)=21.96, p<.0001 | F(4,246)=3.194, p=.0140   |
| Grooming (duration)                                                                           | F(2,246)=5.659, p=.0045 | -                       | -                         |
| Contact (duration)                                                                            | F(2,246)=19.13, p<.0001 | F(2,246)=74.11, p<.0001 | F(4,246)=3.469, p<.0001   |
| Total aggression (duration)                                                                   | F(2,246)=56.52, p<.0001 | F(2,246)=8.169, p=.0004 | F(4,246)=3.215, p=.0136   |
| Attack latency                                                                                | F(2,246)=189.8, p<.0001 | F(2,246)=47.39, p<.0001 | F(4,246)=15.18, p<.0001   |
| <b>Supplementary Figure 2: i.c.v. injection of IL-1RA (n=17)</b>                              |                         |                         |                           |
| Repeated 2-way ANOVA                                                                          |                         |                         |                           |
|                                                                                               | Main effect of Drug     | Main effect of Days     | Drug x Days Interaction   |
| Attack latency                                                                                | F(1,45)=9.179, p=0.0084 | F(3,45)=6.897, p=0.0006 | -                         |
| Attack bites (frequency)                                                                      | F(1,45)=7.027, p=0.0197 | F(3,45)=7.575, p=0.0003 | F(3,45)=3.388, p=0.0260   |
| Sideways threats (duration)                                                                   | F(1,45)=4.574, p=0.0493 | F(3,45)=6.992, p=0.0006 | -                         |
| Tail rattles (duration)                                                                       | F(1,45)=3.362, p=0.0866 | F(3,45)=4.895, p=0.0050 | -                         |
| Pursuit (duration)                                                                            | -                       | -                       | -                         |
| Locomotion (duration)                                                                         | -                       | -                       | -                         |
| Rearing (duration)                                                                            | -                       | F(3,45)=2.304, p=0.0897 | -                         |
| Grooming (duration)                                                                           | F(1,45)=8.251, p=0.0116 | -                       | -                         |
| Contact (duration)                                                                            | -                       | F(3,45)=6.069, p=0.0015 | -                         |
| <b>Supplementary Figure 3: Intra-DRN injection of IL-1RA (n=24)</b>                           |                         |                         |                           |
| Repeated 2-way ANOVA                                                                          |                         |                         |                           |
|                                                                                               | Main effect of Drug     | Main effect of Days     | Drug x Days Interaction   |
| Attack bites (frequency)                                                                      | F(1,22)=9.786, p=0.0049 | F(1,22)=19.25, p=0.0002 | -                         |
| Sideways threats (duration)                                                                   | F(1,22)=2.689, p=0.0715 | -                       | -                         |
| Tail rattles (duration)                                                                       | -                       | -                       | -                         |
| Pursuit (duration)                                                                            | F(1,22)=6.468, p=0.0185 | F(1,22)=4.467, p=0.0461 | -                         |
| Locomotion (duration)                                                                         | -                       | -                       | -                         |
| Rearing (duration)                                                                            | -                       | -                       | -                         |
| Grooming (duration)                                                                           | F(1,22)=5.780, p=0.0251 | F(1,22)=6.362, p=0.0194 | F(1,22)=3.630, p=0.0699   |
| Contact (duration)                                                                            | F(1,22)=2.079, p=0.0989 | F(1,22)=17.69, p=0.0004 | -                         |

| <b>Supplementary Figure 4: Intra-DRN injection of IL-1RA in NON animals (n=12)</b> |                           |                           |                          |
|------------------------------------------------------------------------------------|---------------------------|---------------------------|--------------------------|
| Repeated 2-way ANOVA                                                               |                           |                           |                          |
|                                                                                    | Main effect of Drug       | Main effect of Days       | Drug x Days Interaction  |
| Attack bites (frequency)                                                           | -                         | -                         | -                        |
| Sideways threats (duration)                                                        | -                         | -                         | -                        |
| Tail rattles (duration)                                                            | -                         | -                         | -                        |
| Pursuit (duration)                                                                 | -                         | -                         | -                        |
| Locomotion (duration)                                                              | -                         | $F(1,10)=3.582, p=0.0877$ | -                        |
| Rearing (duration)                                                                 | -                         | -                         | -                        |
| Grooming (duration)                                                                | -                         | $F(1,10)=3.663, p=0.0846$ | -                        |
| Contact (duration)                                                                 | -                         | $F(1,10)=7.849, p=0.0187$ | -                        |
| <b>Supplementary Figure 5: DRN IL-1R1 knockdown (n=36)</b>                         |                           |                           |                          |
| Repeated 2-way ANOVA                                                               |                           |                           |                          |
|                                                                                    | Main effect of Virus      | Main effect of Days       | Virus x Days Interaction |
| Attack bites (frequency)                                                           | $F(1,68)=7.515, p=0.0097$ | $F(2,68)=6.780, p=0.0021$ | -                        |
| Sideways threats (duration)                                                        | $F(1,68)=4.539, p=0.0404$ | $F(2,68)=9.721, p=0.0002$ | -                        |
| Tail rattles (duration)                                                            | $F(1,68)=3.497, p=0.0701$ | $F(2,68)=5.097, p=0.0087$ | -                        |
| Pursuit (duration)                                                                 | $F(1,68)=6.913, p=0.0128$ | $F(2,68)=3.733, p=0.0290$ | -                        |
| Locomotion (duration)                                                              | -                         | $F(2,68)=11.47, p<0.0001$ | -                        |
| Rearing (duration)                                                                 | $F(1,68)=5.912, p=0.0205$ | -                         | -                        |
| Grooming (duration)                                                                | $F(1,68)=6.389, p=0.0163$ | $F(2,68)=4.205, p=0.0190$ | -                        |
| Contact (duration)                                                                 | -                         | $F(2,68)=4.939, p=0.0099$ | -                        |
| <b>Supplementary Figure 6: Intra-DRN injection of IL-1B (n=16)</b>                 |                           |                           |                          |
| Repeated 2-way ANOVA                                                               |                           |                           |                          |
|                                                                                    | Main effect of Drug       | Main effect of Days       | Drug x Days Interaction  |
| Attack latency                                                                     | $F(1,14)=3.814, p=0.0711$ | -                         | -                        |
| Total aggression (duration)                                                        | $F(1,14)=7.311, p=0.0171$ | -                         | -                        |
| Unpaired t test                                                                    |                           |                           |                          |
|                                                                                    | Day1                      | Day2&3                    |                          |
| Attack bites (frequency)                                                           | -                         | $t(14)=3.041, p=0.0088$   |                          |
| Sideways threats (duration)                                                        | -                         | $t(14)=2.076, p=0.0568$   |                          |
| Tail rattles (duration)                                                            | -                         | $t(14)=2.808, p=0.0139$   |                          |
| Pursuit (duration)                                                                 | -                         | -                         |                          |

**Supplementary Table 3. Blood cytokine and chemokine responses to aggressive encounter in aggressor (AGG) and non-aggressor (NON).** No significant interaction was detected in any cytokines or chemokines.

|               | 20 min           |                  | 24 hrs           |                   | Repeated 2-way ANOVA       |                         |
|---------------|------------------|------------------|------------------|-------------------|----------------------------|-------------------------|
|               | AGG              | NON              | AGG              | NON               | AGG vs NON                 | 20 min vs 24 hrs        |
|               | n = 12           | n = 9            | n = 9            | n = 9             |                            |                         |
| IL-1 $\alpha$ | 449.2 $\pm$ 40.1 | 355.5 $\pm$ 56.4 | 489.4 $\pm$ 63.5 | 685.9 $\pm$ 139.7 | <i>ns</i>                  | F(1,34)=4.276, p=0.0463 |
| IL-2          | 1.9 $\pm$ 0.2    | 2.2 $\pm$ 0.6    | 2.2 $\pm$ 0.4    | 1.7 $\pm$ 0.4     | <i>ns</i>                  | <i>ns</i>               |
| IL-4          | 0.4 $\pm$ 0.1    | 0.5 $\pm$ 0.1    | 0.3 $\pm$ 0.0    | 0.3 $\pm$ 0.0     | <i>ns</i>                  | F(1,33)=6.954, p=0.0125 |
| IL-6          | 3.2 $\pm$ 1.1    | 4.2 $\pm$ 2.3    | 2.2 $\pm$ 1.7    | 0.6 $\pm$ 0.3     | <i>ns</i>                  | F(1,33)=5.315, p=0.0276 |
| IL-7          | 5.3 $\pm$ 2.3    | 7.9 $\pm$ 5.0    | 0.6 $\pm$ 0.6    | 0.3 $\pm$ 0.2     | <i>ns</i>                  | F(1,34)=5.384, p=0.0265 |
| IL-9          | 93.8 $\pm$ 20.6  | 82.2 $\pm$ 23.7  | 43.8 $\pm$ 7.5   | 56.5 $\pm$ 15.0   | <i>ns</i>                  | F(1,34)=3.410, p=0.0735 |
| IL-15         | 52.1 $\pm$ 31.1  | 58.9 $\pm$ 31.4  | 14.1 $\pm$ 2.0   | 10.9 $\pm$ 3.1    | <i>ns</i>                  | F(1,34)=3.302, p=0.0780 |
| IL-17         | 8.3 $\pm$ 1.7    | 8.7 $\pm$ 3.4    | 3.8 $\pm$ 0.9    | 2.6 $\pm$ 0.5     | <i>ns</i>                  | F(1,34)=7.865, p=0.0083 |
| IP-10         | 59.3 $\pm$ 5.0   | 58.3 $\pm$ 3.0   | 64.5 $\pm$ 5.4   | 57.0 $\pm$ 3.6    | <i>ns</i>                  | <i>ns</i>               |
| KC            | 42.3 $\pm$ 3.2   | 38.6 $\pm$ 1.8   | 29.6 $\pm$ 2.7   | 25.1 $\pm$ 3.8    | <i>ns</i>                  | F(1,35)=18.42, p=0.0001 |
| LIX           | 9012 $\pm$ 661   | 10215 $\pm$ 345  | 8816 $\pm$ 414   | 9264 $\pm$ 416    | <i>ns</i>                  | <i>ns</i>               |
| MCP-1         | 15.4 $\pm$ 2.8   | 15.7 $\pm$ 1.8   | 10.0 $\pm$ 2.4   | 7.9 $\pm$ 2.0     | <i>ns</i>                  | F(1,34)=8.105, p=0.0074 |
| M-CSF         | 7.5 $\pm$ 0.9    | 8.6 $\pm$ 1.7    | 9.4 $\pm$ 2.2    | 6.1 $\pm$ 0.4     | <i>ns</i>                  | <i>ns</i>               |
| MIG           | 97.1 $\pm$ 17.5  | 139.4 $\pm$ 40.8 | 82.1 $\pm$ 4.6   | 70.1 $\pm$ 6.1    | <i>ns</i>                  | F(1,34)=2.958, p=0.0945 |
| MIP-1a        | 33.4 $\pm$ 4.7   | 27.2 $\pm$ 6.5   | 34.5 $\pm$ 6.4   | 25.1 $\pm$ 6.3    | <i>ns</i>                  | <i>ns</i>               |
| MIP-2         | 92.3 $\pm$ 4.4   | 84.5 $\pm$ 5.1   | 91.3 $\pm$ 11.3  | 88.7 $\pm$ 7.9    | <i>ns</i>                  | <i>ns</i>               |
| RANTES        | 11.8 $\pm$ 1.4   | 12.5 $\pm$ 1.3   | 15.7 $\pm$ 1.6   | 16.1 $\pm$ 1.3    | <i>ns</i>                  | F(1,35)=6.487, p=0.0154 |
| TNF $\alpha$  | 3.6 $\pm$ 1.0    | 2.5 $\pm$ 0.6    | 2.5 $\pm$ 0.4    | 1.5 $\pm$ 0.3     | <i>ns</i>                  | <i>ns</i>               |
| VEGF          | 0.7 $\pm$ 0.3    | 1.0 $\pm$ 0.4    | 1.1 $\pm$ 0.4    | 1.0 $\pm$ 0.3     | <i>ns</i>                  | <i>ns</i>               |
| Eotaxin       | 347.0 $\pm$ 42.8 | 378.2 $\pm$ 29.1 | 337.8 $\pm$ 34.6 | 365.1 $\pm$ 45.4  | <i>ns</i>                  | <i>ns</i>               |
| G-CSF         | 134.7 $\pm$ 31.9 | 113.6 $\pm$ 34.9 | 92.6 $\pm$ 25.9  | 50.0 $\pm$ 7.7    | F(1,33)=3.315,<br>p=0.0777 | <i>ns</i>               |

**Supplementary Table 4. DRN cytokine responses to aggressive encounter in aggressor (AGG) and non-aggressor (NON). Multiplex ELISA analysis showed no significant difference was detected in any cytokines other than IL-1 $\beta$  (see Figure 1).**

|               | AGG           | NON           | t-test    |
|---------------|---------------|---------------|-----------|
|               | n = 8         | n = 6         |           |
| IL-4          | 3.9 $\pm$ 0.9 | 3.6 $\pm$ 0.5 | <i>ns</i> |
| IL-6          | 2.7 $\pm$ 0.1 | 2.7 $\pm$ 0.2 | <i>ns</i> |
| IL-10         | 8.6 $\pm$ 0.4 | 9.2 $\pm$ 0.7 | <i>ns</i> |
| TNF- $\alpha$ | 3.7 $\pm$ 0.1 | 3.9 $\pm$ 0.3 | <i>ns</i> |
| IFN- $\gamma$ | 3.0 $\pm$ 0.3 | 4.5 $\pm$ 1.3 | <i>ns</i> |

Supplementary Table 5. mRNA expression of IL-1 $\beta$ , IL-1 receptors (IL-1R1 and IL-1R2), IL-1 receptor antagonist (IL-1RA), and adaptor proteins of IL-1 receptor (IL-1RaP and IL-1RaPb) in the DRN of AGG and NON animals. Values indicate normalized expression of each mRNA relative to Gapdh mRNA expression.

|              | AGG             | NON             | t-test                  |
|--------------|-----------------|-----------------|-------------------------|
|              | n = 11          | n = 11          |                         |
| IL-1 $\beta$ | 0.83 $\pm$ 0.12 | 1.31 $\pm$ 0.18 | $t(20)=2.239, p=0.0367$ |
| IL-1R1       | 0.89 $\pm$ 0.08 | 1.12 $\pm$ 0.20 | <i>ns</i>               |
| IL-1R2       | 0.87 $\pm$ 0.12 | 1.05 $\pm$ 0.15 | <i>ns</i>               |
| IL-1RA       | 0.96 $\pm$ 0.13 | 1.06 $\pm$ 0.06 | <i>ns</i>               |
| IL-1RaP      | 0.94 $\pm$ 0.08 | 0.94 $\pm$ 0.09 | <i>ns</i>               |
| IL-1RaPb     | 0.95 $\pm$ 0.05 | 0.96 $\pm$ 0.08 | <i>ns</i>               |

**Supplementary Table 6. mRNA expression of IL-1RaP, IL-1RA, IL-1 $\beta$ , and TNF $\alpha$  genes after IL-1R1 knockdown in the DRN. Significant reduction of IL-1RaP mRNA expression was observed by IL-1R1 KD compared to Luc control. IL-1R2 expression was below the detection in any group (ND). Values indicate normalized expression of each mRNA relative to Gapdh mRNA expression.**

|               | KD              | Luc             | t-test                               |
|---------------|-----------------|-----------------|--------------------------------------|
|               | n = 6           | n = 5           |                                      |
| IL-1RaP       | 0.84 $\pm$ 0.04 | 1.19 $\pm$ 0.12 | <i>t</i> (9)=3.075, <i>p</i> =0.0132 |
| IL1R2         | ND              | ND              | -                                    |
| IL-1RA        | 0.87 $\pm$ 0.08 | 1.16 $\pm$ 0.34 | <i>ns</i>                            |
| L-1 $\beta$   | 1.00 $\pm$ 0.31 | 1.01 $\pm$ 0.58 | <i>ns</i>                            |
| TNF- $\alpha$ | 0.93 $\pm$ 0.33 | 1.08 $\pm$ 0.35 | <i>ns</i>                            |



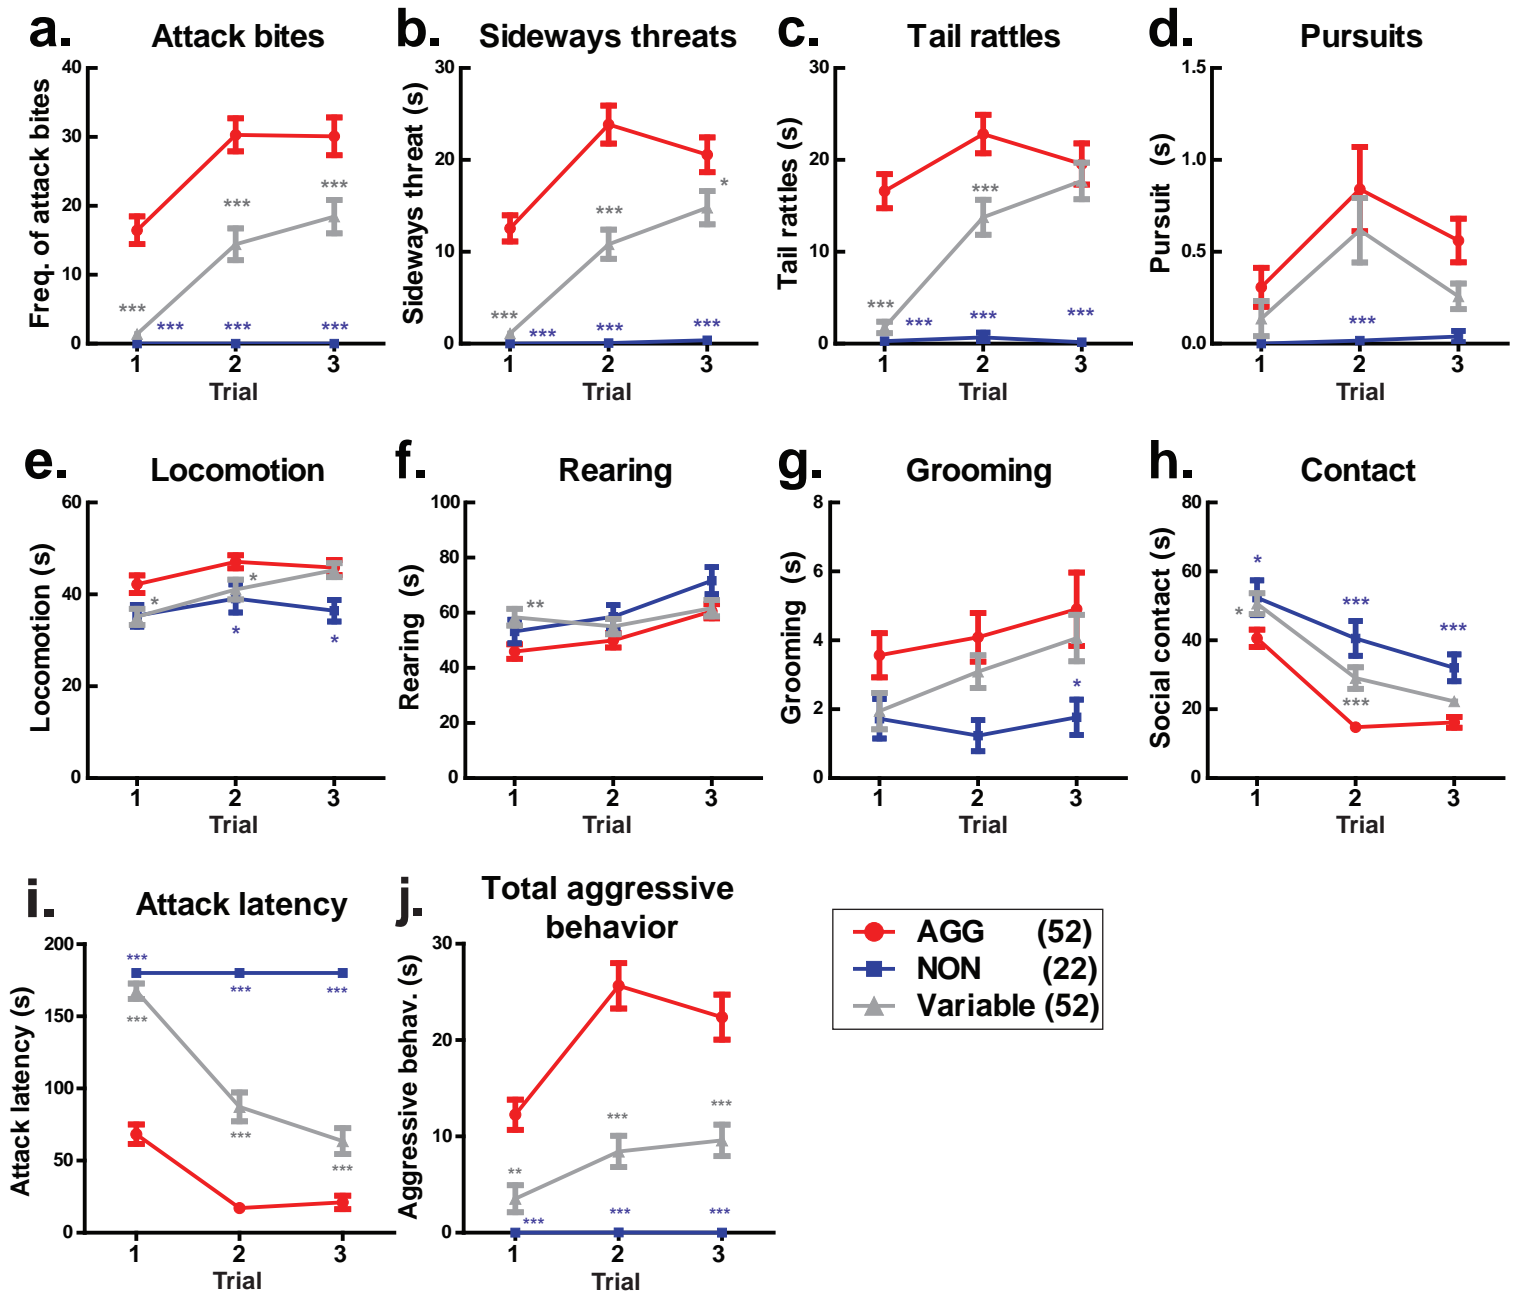

**Supplementary Figure 1. Detailed behavioral profile of Aggressor (AGG), Non-aggressor (NON) and variable animals in resident-intruder test.** a-d Aggressive behaviors including the frequency of attack bites (a), duration of sideways threats (b), tail rattles (c), and pursuits (d). e-h Non aggressive behaviors including the duration of locomotion (e), rearing (f), grooming (g), and social contacts (h). i Latency to the first bite. j Total duration of aggressive behavior. Asterisks indicates significant difference between AGG vs NON (blue asterisks), and AGG vs variables (gray asterisks). \*\*\*  $p < 0.001$ , \*\*  $p < 0.01$ , \*  $p < 0.05$ .

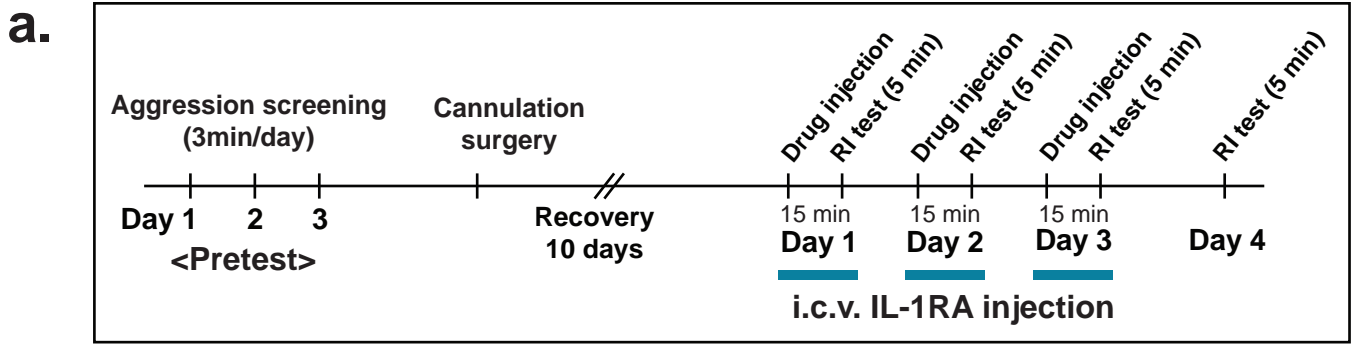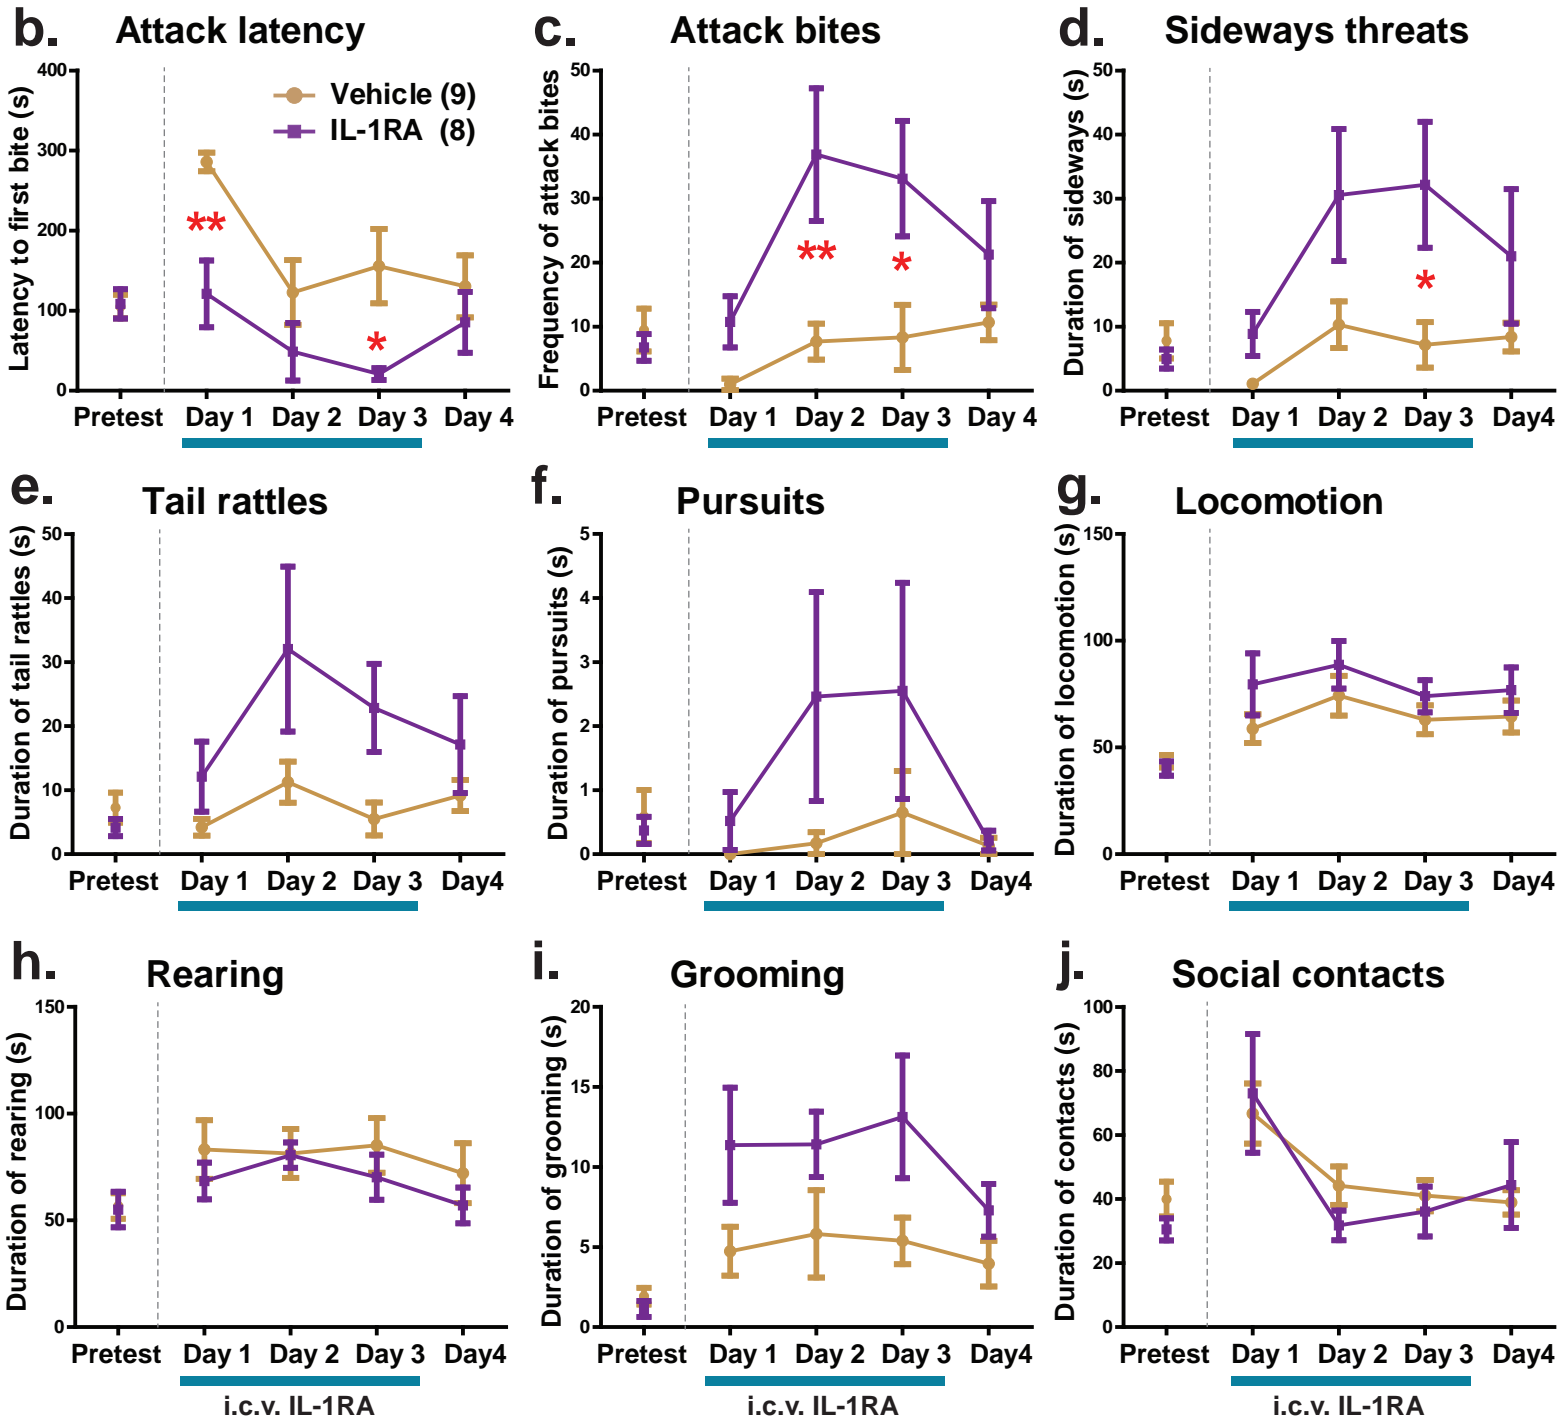

**Supplementary Figure 2. Detailed behavioral profile of male mice after i.c.v. injection of IL-1 receptor antagonist (IL-1RA) in the resident-intruder test.** **a** Schematics of IL-1RA i.c.v. injection experiment. RI test: resident-intruder test. Pretest data is an average of 3-days RI tests before the surgery. In the test, IL-1RA was injected into the lateral ventricle 15 min before the RI test, and this encounter was repeated for 3 days. On the day 4, RI test was conducted without any injection. **b-f** Aggressive behaviors including the attack latency (**b**), frequency of attack bites (**c**), duration of sideways threats (**d**), tail rattles (**e**), and pursuits (**f**). **g-j** Non aggressive behaviors including the duration of locomotion (**g**), rearing (**h**), grooming (**i**), and social contact (**j**). Numbers in the parenthesis indicate the number of animals used in each group. \*\* $p < 0.01$ , \* $p < 0.05$  between vehicle and IL-1RA in each test day.

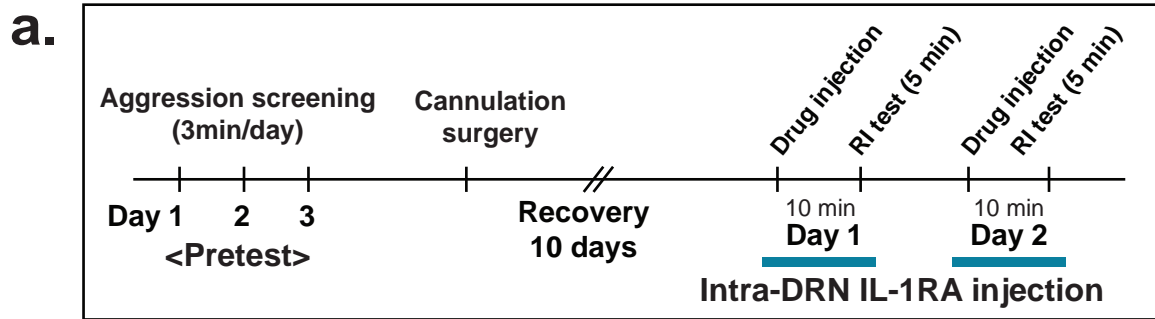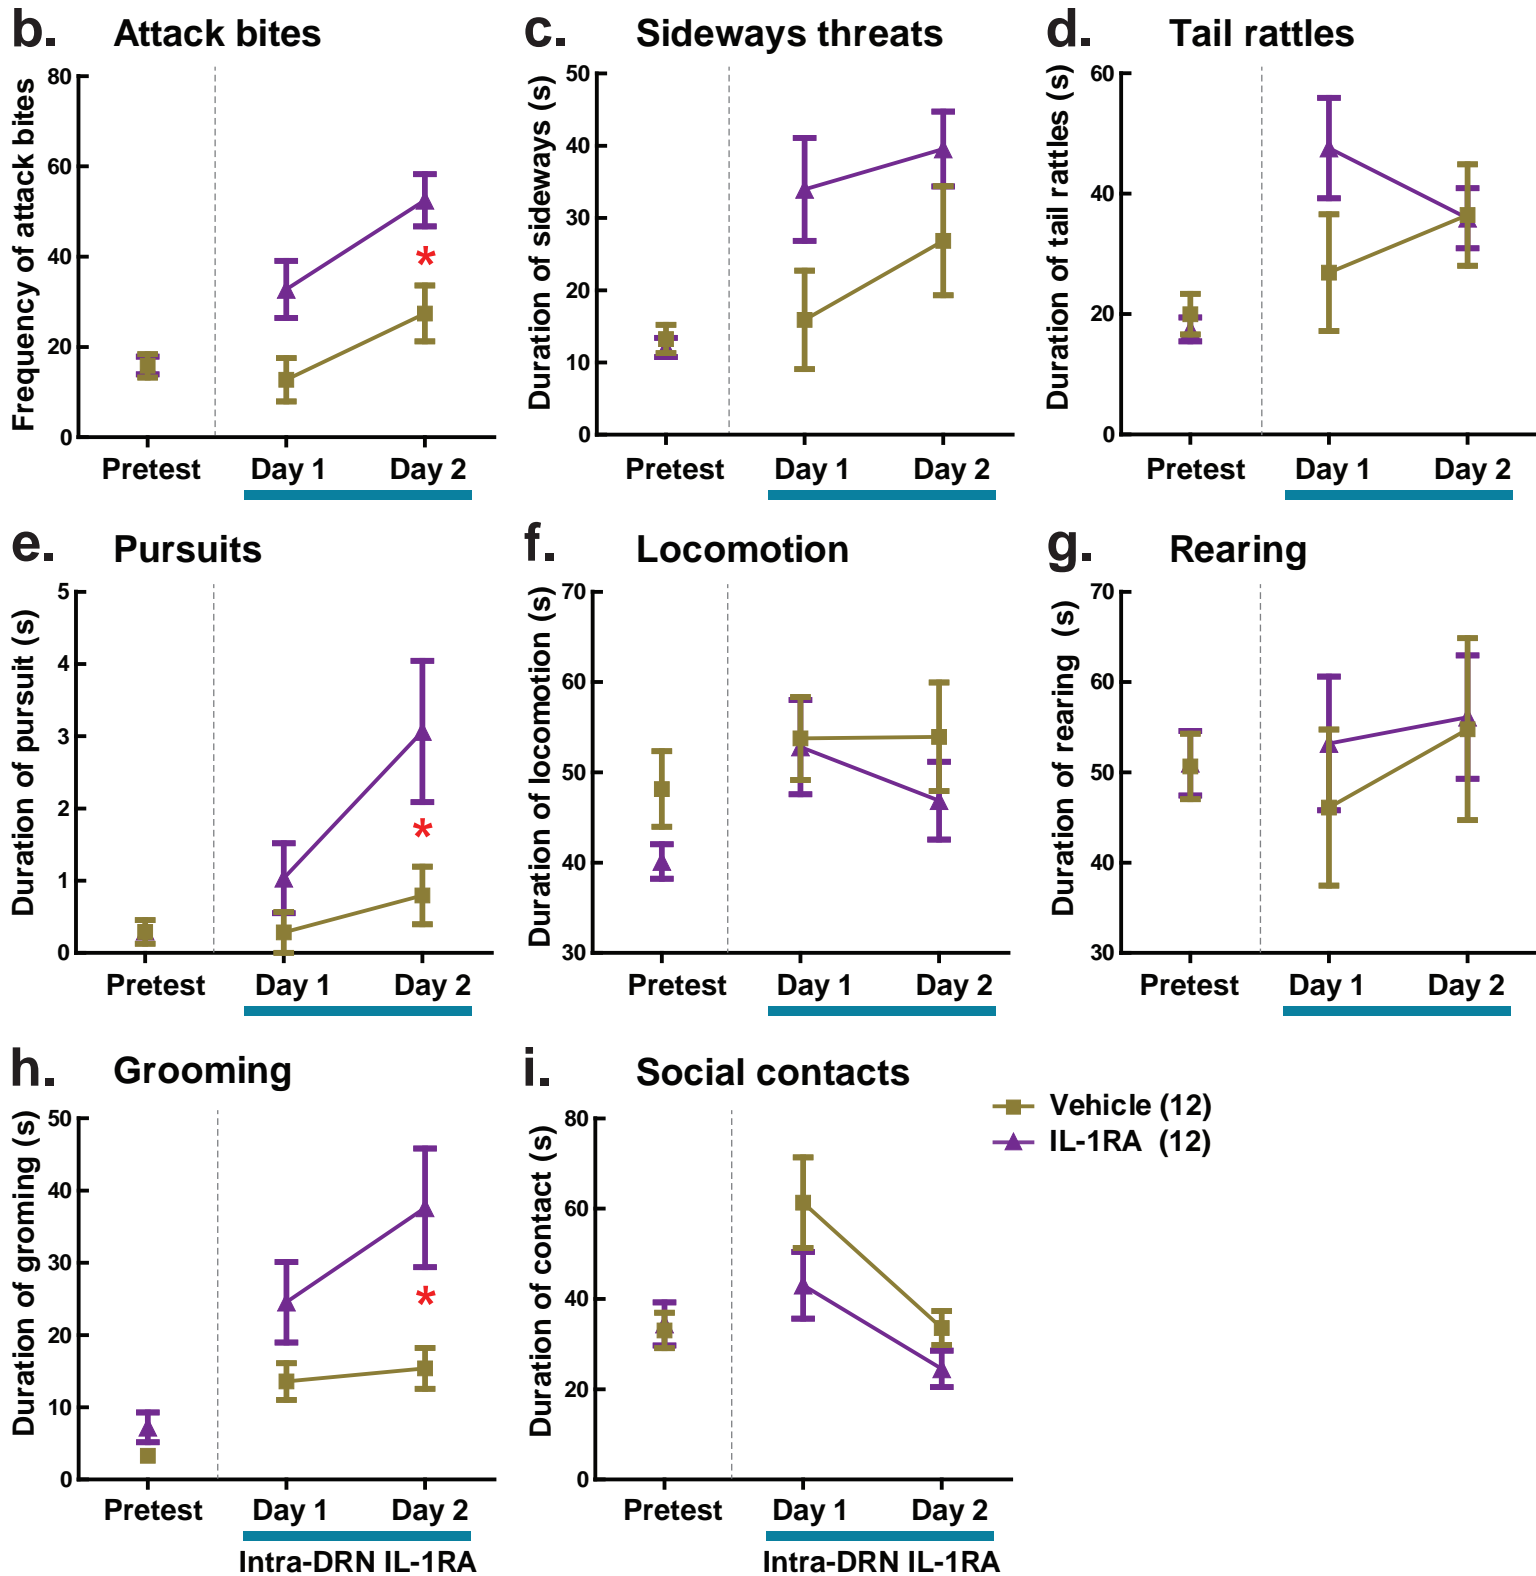

**Supplementary Figure 3. Detailed behavioral profile of male mice after intra-DRN injection of IL-1RA in the resident-intruder test.** **a** Schematics of IL-1RA intra-DRN injection experiment. RI test: resident-intruder test. Pretest data is an average of 3-days RI tests before the surgery. In the test, IL-1RA was injected into the DRN 10 min before the RI test, and this encounter was repeated for 2 days. **b-e** Aggressive behaviors including the frequency of attack bites (**b**), duration of sideways threats (**c**), tail rattles (**d**), and pursuits (**e**). **f-j** Non aggressive behaviors including the duration of locomotion (**f**), rearing (**g**), grooming (**h**), and social contacts (**i**). Numbers in the parenthesis indicate the number of animals used in each group. \* $p < 0.05$  between vehicle and IL-1RA in each test day (post-hoc test).

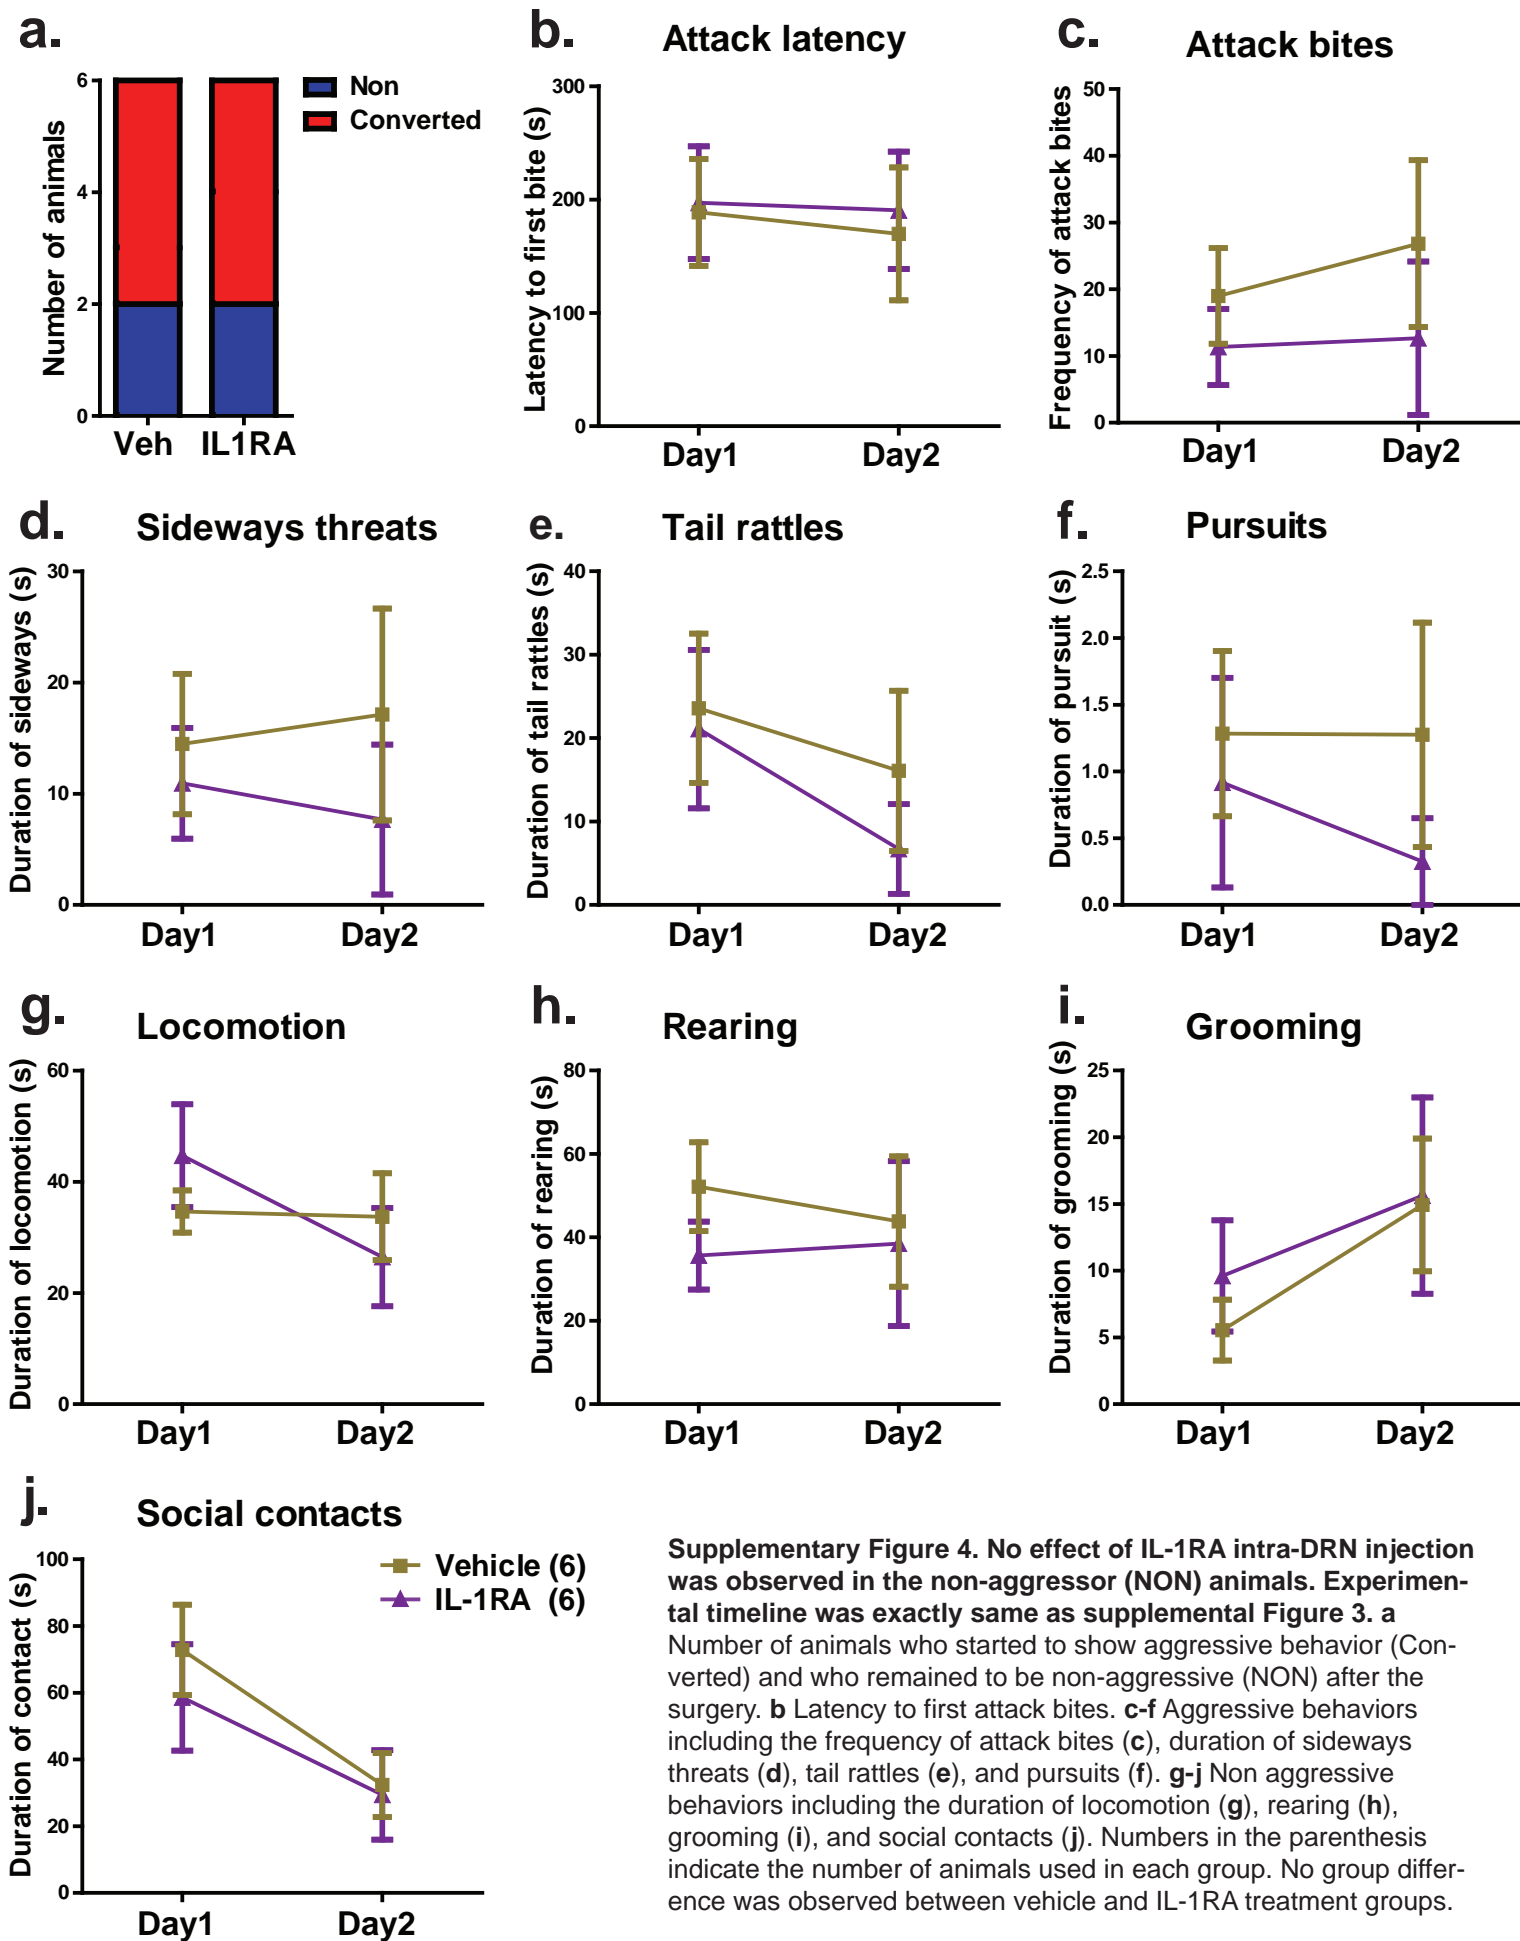

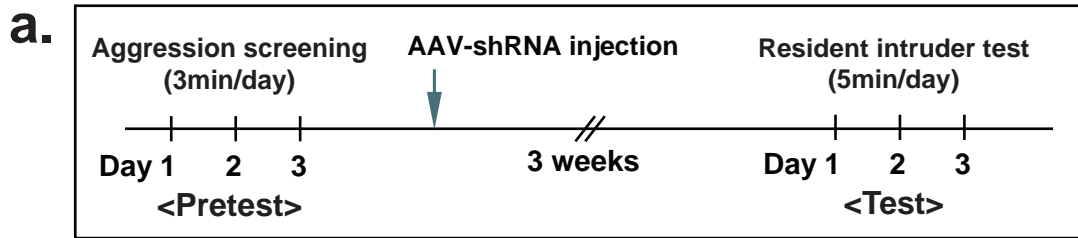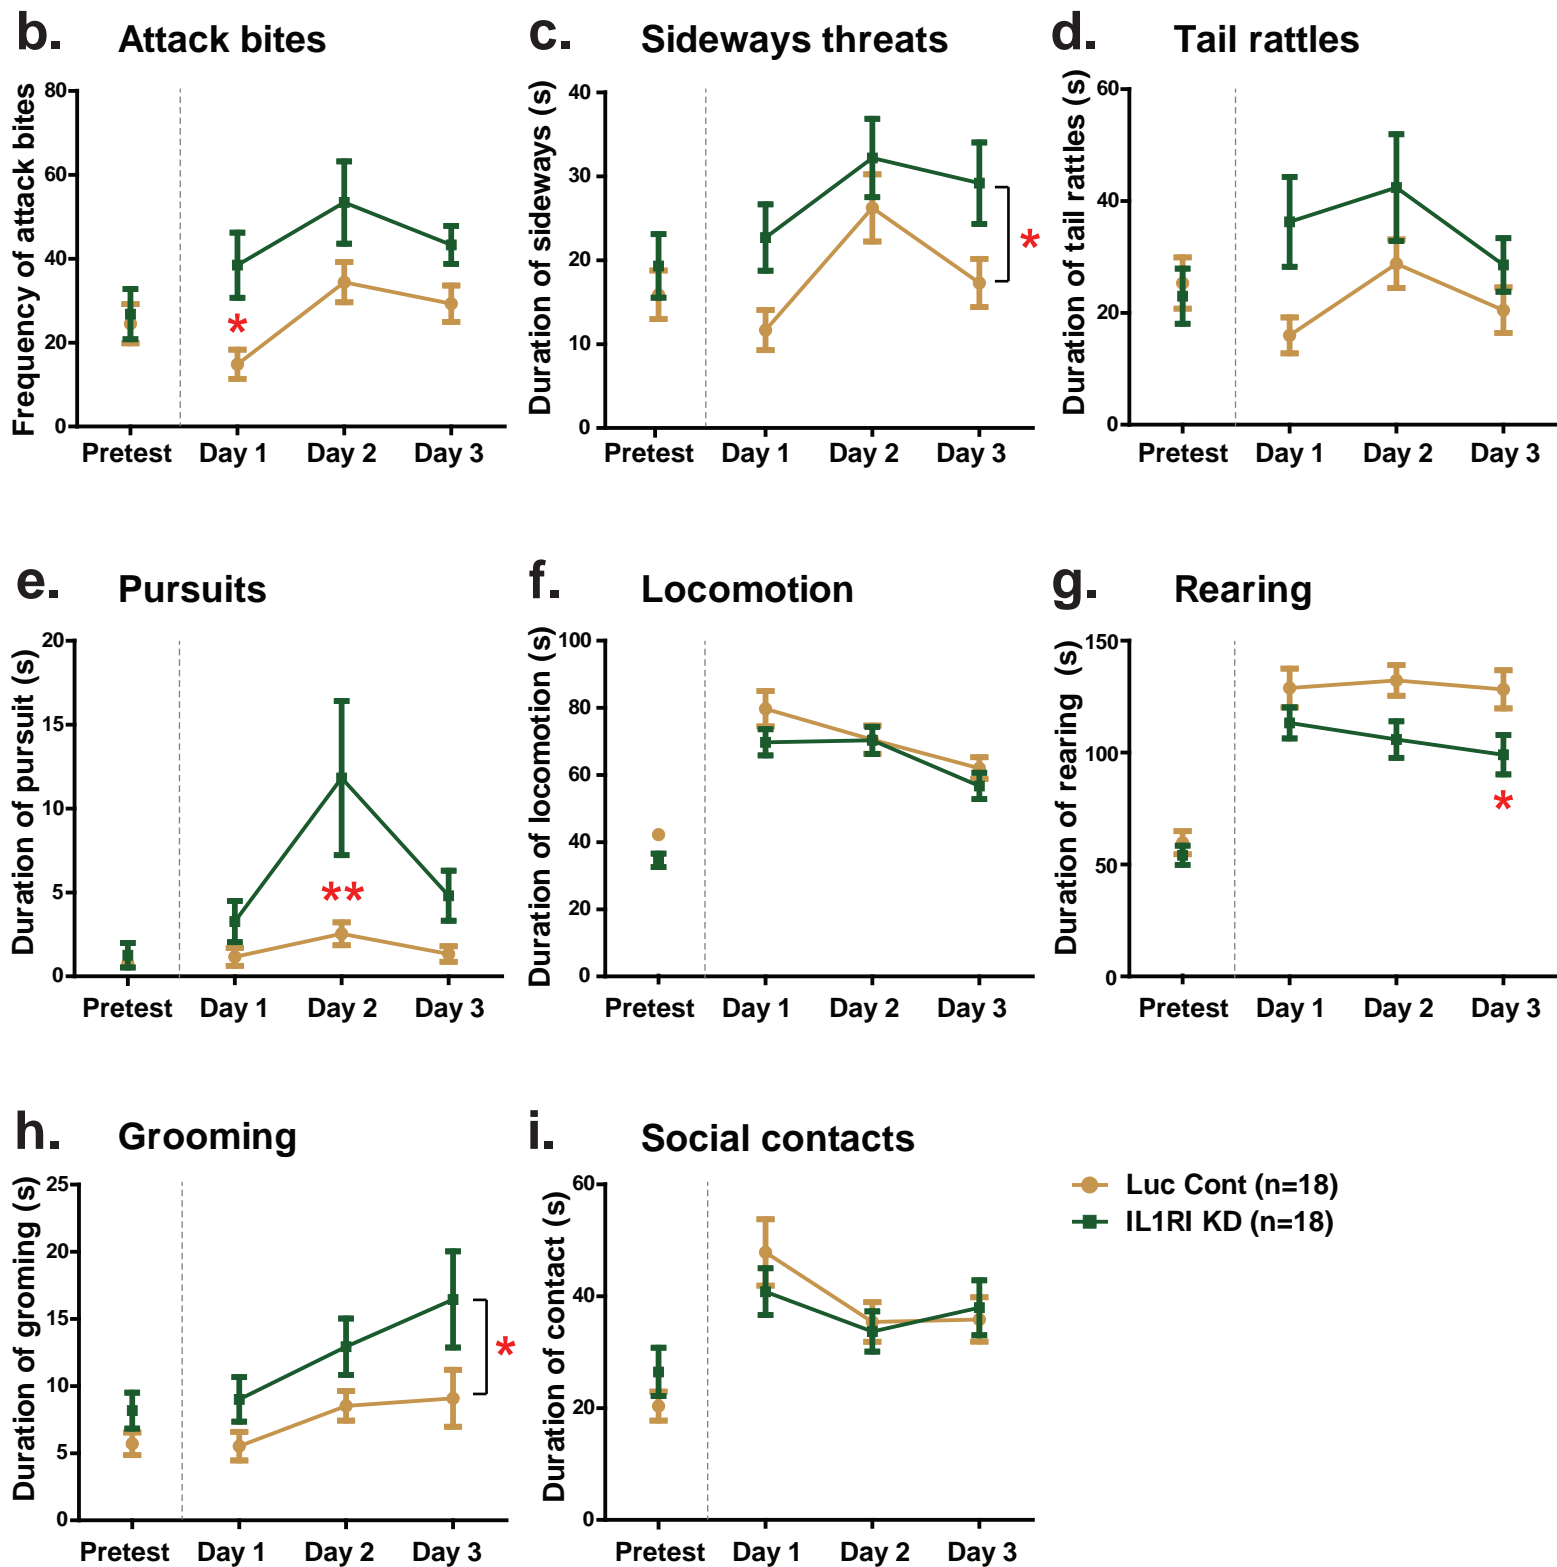

**Supplementary Figure 5. Detailed behavioral profile of male mice after IL-1 receptor type 1 (IL-1R1) knockdown in the resident-intruder test.** **a** Schematic timeline of IL-1R1 KD using shRNA expressing AAV injection. Either control luciferase (Luc) shRNA or IL-1R1 shRNA expressing AAV was injected into the DRN 2 weeks before the test. RI test: resident-intruder test. Pretest data is an average of 3-days RI tests before the surgery. **b-e** Aggressive behaviors including the frequency of attack bites (**b**), duration of sideways threats (**c**), tail rattles (**d**), and pursuits (**e**). **f-j** Non aggressive behaviors including the duration of locomotion (**f**), rearing (**g**), grooming (**h**), and social contacts (**i**). Numbers in the parenthesis indicate the number of animals used in each group. \*\* $p < 0.01$ , \* $p < 0.05$  between vehicle and IL-1RA in each test day (post-hoc test) or significant main effect of drug treatment in the 2-way ANOVA.

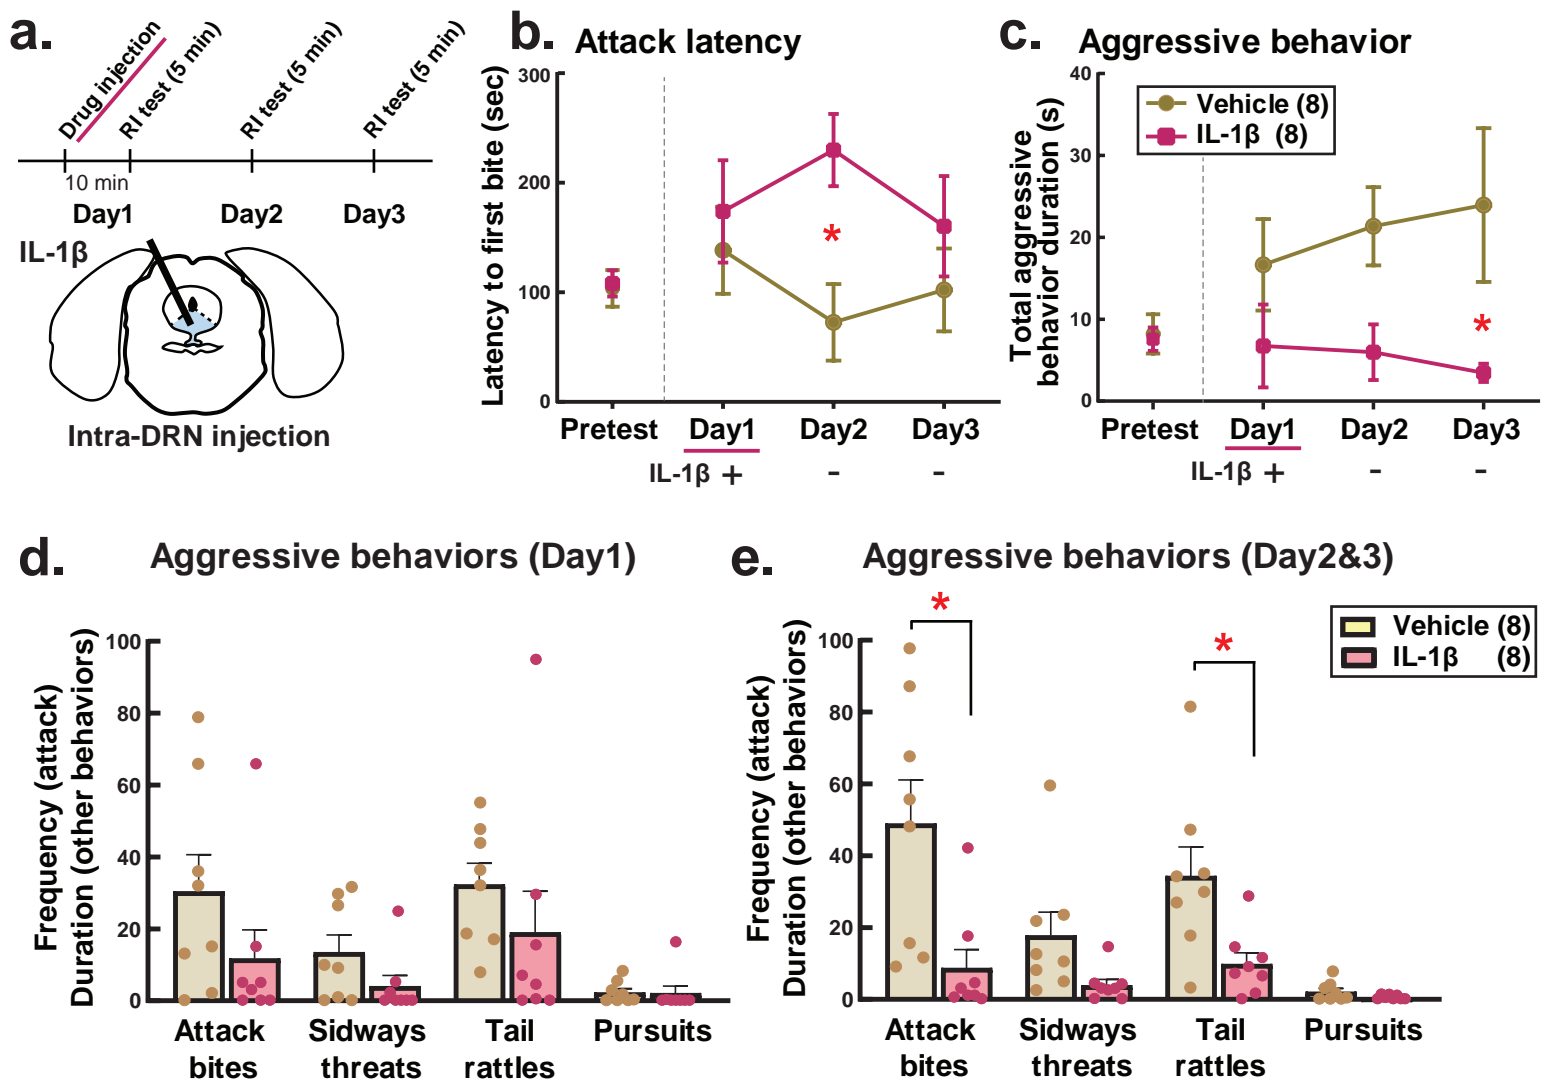

**Supplementary figure 6. Long-term effect of IL-1 $\beta$  injection into the DRN on aggressive behavior of male mice.**  
**a** Schematic timeline of intra-DRN IL-1 $\beta$  injection experiment. RI test: resident-intruder test. IL-1 $\beta$  (200 pg) was injected into the DRN only Day1 of the experiment. **b-c** Effect of i.v.c. IL-1RA injection on the attack latency (**b**) and duration of aggressive behaviors (**c**). **d-e** Detailed behavioral analysis for aggressive behaviors on Day1 (**d**) and Day2&3 (**e**). For Day2&3, average data of Day2 and Day3 of resident intruder test was presented. Numbers in the parenthesis indicate the number of animals used in each group. \* $p < 0.05$ .

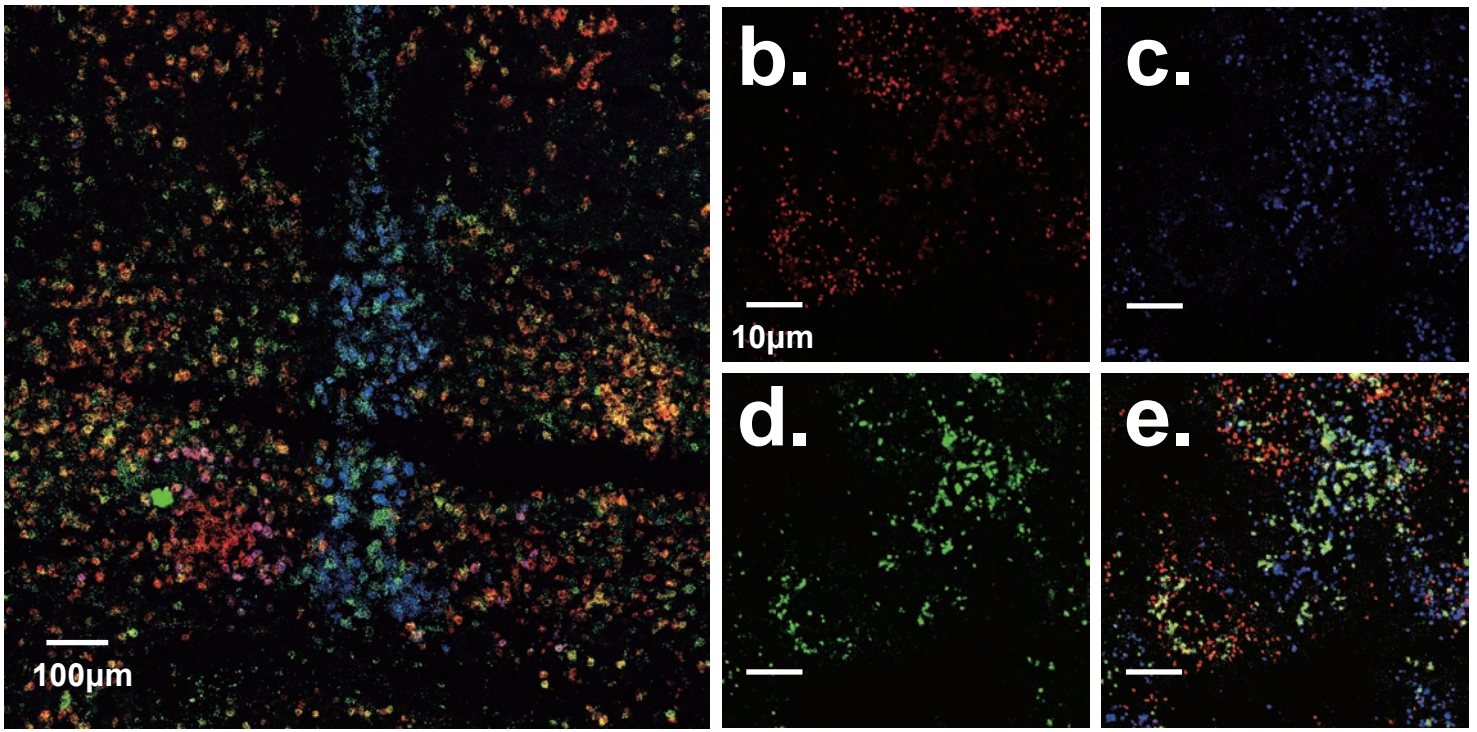

**Supplementary Figure 7. Expression of c-Fos mRNA on GABA neurons and vGlut3-positive glutamatergic neurons in the DRN.** **a** Representative picture of the expression of c-Fos (green), GAD67 (red) and vGlut3 (blue) in the DRN by RNAscope analysis. **b-e** Enlarged pictures of the DRN showing GAD67 (**b**), vGlut3 (**c**), c-Fos (**d**), and their co-localization (**e**).
